# Supplementary material for: Comparison of trauma outcomes between Japan and the USA using national trauma registries
Source: PubMed Central journal article supplement — Trauma Surg Acute Care Open. 2018 Nov 5;3(1):e000247. doi: 10.1136/tsaco-2018-000247 (PMC6241981; doi:10.1136/tsaco-2018-000247), 2018-11-05
Supplement: tsaco-2018-000247supp001.pdf [file tsaco-2018-000247supp001.pdf]

## Supplemental file 1 Unification of dictionary between JTDB and NTDB.

### 1. Injury of mechanism

| This study classification | JTDB dictionary                                                                                                                                                                                                                                                                                      | NTDB dictionary                                                                                                                                                                                                                                                                                                                                                                                      |
|---------------------------|------------------------------------------------------------------------------------------------------------------------------------------------------------------------------------------------------------------------------------------------------------------------------------------------------|------------------------------------------------------------------------------------------------------------------------------------------------------------------------------------------------------------------------------------------------------------------------------------------------------------------------------------------------------------------------------------------------------|
| MVC                       | Car driver<br>Driver's assistant<br>Bask seat<br>Autobike driver<br>Autobike fellow passenger<br>Bicycle passenger<br>Other passenger                                                                                                                                                                | MVT Occupant<br>MVT Motorcyclist<br>MVT Pedal cyclist<br>MVT Other<br>MVT Unspecified<br>Pedal cyclist, other                                                                                                                                                                                                                                                                                        |
| Fall                      | Fall (high place)<br>Fall (stairs)<br>Fall                                                                                                                                                                                                                                                           | Fall                                                                                                                                                                                                                                                                                                                                                                                                 |
| Pedestrian                | Foot passenger                                                                                                                                                                                                                                                                                       | MVT Pedestrian<br>Pedestrian, other                                                                                                                                                                                                                                                                                                                                                                  |
| GSW                       | Gunshot wound                                                                                                                                                                                                                                                                                        | Firearm                                                                                                                                                                                                                                                                                                                                                                                              |
| SW                        | Cut wound                                                                                                                                                                                                                                                                                            | Cut/pierce                                                                                                                                                                                                                                                                                                                                                                                           |
| Others                    | Rotation machine<br>Press machine<br>Falling object<br>Explosive<br>Compression by heavy stuff<br>House collapse, landslide<br>Train<br>Sports<br>Piling wound<br>Fire<br>Hot water<br>Exlosion<br>Chemical substance<br>Others (blunt)<br>Others (penetrating)<br>Others (burn)<br>Others (machine) | Fire/flame<br>Hot object/substance<br>Machinery<br>Natural/environmental, Bites and stings<br>Natural/environmental, Other<br>Overexertion<br>Poisoning<br>Struck by, against<br>Drowning/submersion<br>Suffocation<br>Other specified and classifiable<br>Other specified, not elsewhere classifiable<br>Unspecified<br>Adverse effects, drugs<br>Adverse effects, medical care<br>Transport, other |

Abbreviations: JTDB, Japanese Trauma Data Bank; NTDB, National Trauma Data Bank; MVC, motor vehicle crash; MVT, motor vehicle trauma; GSW, gunshot wound; SW, stab wounds.

## 2. Cause of trauma

| <b>This study classification</b> | <b>JTDB dictionary</b>   | <b>NTDB dictionary</b> |
|----------------------------------|--------------------------|------------------------|
| Unintentional                    | Accident<br>Occupational | Unintentional          |
| Self-inflicted                   | Suicide                  | Self-inflicted         |
| Assault                          | Homicide                 | Assault                |
| Others                           | Others<br>Unknown        | Other<br>Undetermined  |

Abbreviations: JTDB, Japanese Trauma Data Bank; NTDB, National Trauma Data Bank.

## 3. Disposition at discharge

| <b>This study classification</b> | <b>JTDB dictionary</b>   | <b>NTDB dictionary</b>                                                                                                                                                               |
|----------------------------------|--------------------------|--------------------------------------------------------------------------------------------------------------------------------------------------------------------------------------|
| Transferred                      | Other medical facilities | Short term general hospital<br>Intermediate care facility<br>SNF<br>Hospice<br>Other long term care<br>DC/Trans to inpatient rehab<br>Long Term Care Hospital<br>Psych hospital/unit |
| Home                             | Home                     | Home under home health agency<br>Home - no services                                                                                                                                  |
| Other                            | Others                   | AMA<br>DC to court/Law Enforcement<br>DC Other type of facility                                                                                                                      |
| Death                            | Death                    | Expired                                                                                                                                                                              |

Abbreviations: JTDB, Japanese Trauma Data Bank; NTDB, National Trauma Data Bank; SNF, skilled nursing facility; DC, discharge; AMA, against medical advice.
